# Supplementary material for: Social and Behavioral Predictors of Adolescents’ Positive Attitude towards Life and Self
Source: PubMed Central journal article supplement (PMC6888235; doi:10.3390/ijerph16224404), 2019-11-11
Supplement: ijerph-16-04404-s001.pdf [file ijerph-16-04404-s001.pdf]

**Table S1.** Correlations between the variables in the study group.

|                                  |   | 1.     | 2.     | 3.     | 4.     | 5.     | 6.     | 7.     | 8.     | 9.     | 10.   | 11.   | 12. |
|----------------------------------|---|--------|--------|--------|--------|--------|--------|--------|--------|--------|-------|-------|-----|
| 1. Positive Attitude Scale (PAS) |   | 1      |        |        |        |        |        |        |        |        |       |       |     |
| 2. Family Affluence Scale (FAS)  | r | 0.077  | 1      |        |        |        |        |        |        |        |       |       |     |
|                                  | p | 0.000  |        |        |        |        |        |        |        |        |       |       |     |
| 3. Physical Activity (MVPA)      | r | 0.174  | 0.065  | 1      |        |        |        |        |        |        |       |       |     |
|                                  | p | 0.000  | 0.001  |        |        |        |        |        |        |        |       |       |     |
| 4. Tobacco smoking               | r | -0.092 | 0.013  | -0.046 | 1      |        |        |        |        |        |       |       |     |
|                                  | p | 0.000  | 0.487  | 0.013  |        |        |        |        |        |        |       |       |     |
| 5. Alcohol drinking              | r | -0.082 | 0.040  | -0.001 | 0.520  | 1      |        |        |        |        |       |       |     |
|                                  | p | 0.000  | 0.032  | 0.961  | 0.000  |        |        |        |        |        |       |       |     |
| 6. Being drunk                   | r | -0.070 | 0.028  | 0.017  | 0.444  | 0.686  | 1      |        |        |        |       |       |     |
|                                  | p | 0.000  | 0.143  | 0.359  | 0.000  | 0.000  |        |        |        |        |       |       |     |
| 7. Cannabis use                  | r | -0.050 | 0.028  | 0.024  | 0.324  | 0.290  | 0.350  | 1      |        |        |       |       |     |
|                                  | p | 0.008  | 0.143  | 0.193  | 0.000  | 0.000  | 0.000  |        |        |        |       |       |     |
| 8. Academic achievements         | r | 0.278  | 0.102  | 0.064  | -0.250 | -0.205 | -0.188 | -0.135 | 1      |        |       |       |     |
|                                  | p | 0.000  | 0.000  | 0.001  | 0.000  | 0.000  | 0.000  | 0.000  |        |        |       |       |     |
| 9. School stress                 | r | -0.249 | -0.054 | -0.048 | 0.146  | 0.127  | 0.124  | 0.062  | -0.340 | 1      |       |       |     |
|                                  | p | 0.000  | 0.004  | 0.009  | 0.000  | 0.000  | 0.000  | 0.001  | 0.000  |        |       |       |     |
| 10. Family communication         | r | 0.366  | 0.172  | 0.065  | -0.158 | -0.148 | -0.129 | -0.121 | 0.175  | -0.236 | 1     |       |     |
|                                  | p | 0.000  | 0.000  | 0.001  | 0.000  | 0.000  | 0.000  | 0.000  | 0.000  | 0.000  |       |       |     |
| 11. Peers communication          | r | 0.194  | 0.054  | 0.003  | 0.081  | 0.041  | 0.019  | 0.009  | 0.032  | 0.017  | 0.189 | 1     |     |
|                                  | p | 0.000  | 0.004  | 0.856  | 0.000  | 0.029  | 0.299  | 0.645  | 0.089  | 0.354  | 0.000 |       |     |
| 12. Neighborhood social capital  | r | 0.232  | 0.054  | 0.121  | -0.025 | -0.026 | -0.004 | -0.014 | 0.071  | -0.074 | 0.252 | 0.156 | 1   |
|                                  | p | 0.000  | 0.005  | 0.000  | 0.193  | 0.177  | 0.832  | 0.461  | 0.000  | 0.000  | 0.000 | 0.000 |     |

Note: \*r-Pearson correlation; p-significance level
